# Supplementary material
Source: PubMed Central journal article supplement (PMC2481353)
Supplement: 0804257105_0804257105SI.pdf [file 0804257105_0804257105SI.pdf]

# Supporting Information

Collman, *et al.* 10.1073/pnas.0804257105

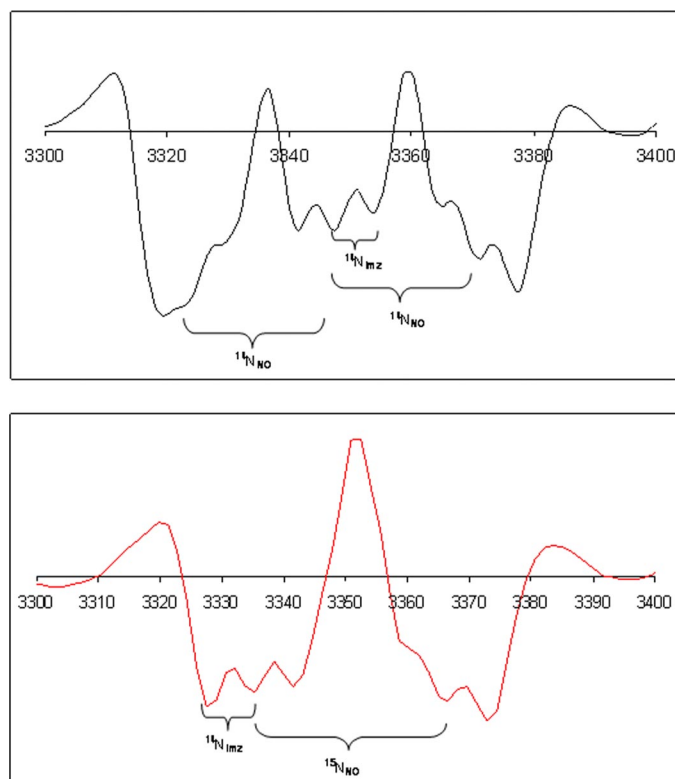

**Fig. S1.** EPR second derivatives of the  $^{14}\text{N}/^{15}\text{N}$  six-coordinate NO derivatives. (Upper) Second derivative of  $^{14}\text{NO}$  EPR signal: presence of the axial imidazole  $^{14}\text{N}$  and NO  $^{14}\text{N}$  is indicated by the  $3 \times 3$  hyperfine pattern. (Lower) Second derivative of  $^{15}\text{NO}$  EPR signal: presence of the axial imidazole  $^{14}\text{N}$  and NO  $^{15}\text{N}$  is indicated by the  $2 \times 3$  hyperfine pattern.

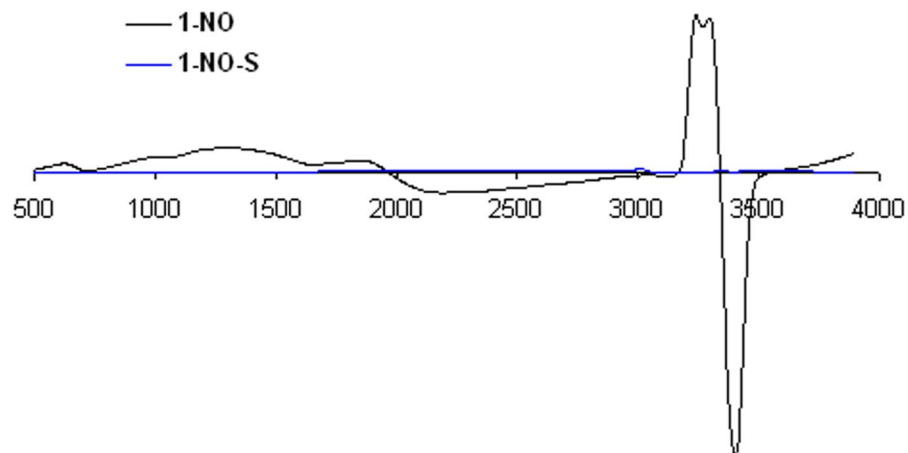

Fig. S2. 4-K EPR data on 1-NO and 1-NO-S. No high-spin  $\text{Fe}^{3+}$  signal is in the low-field region.

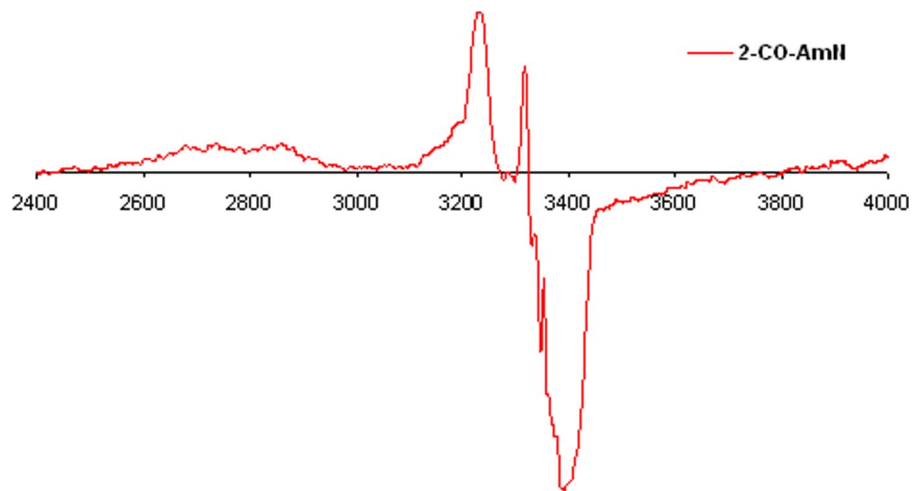

**Fig. S3.** EPR of 2-CO + AmN (2-CO-AmN). The presence of Cu<sup>2+</sup> hyperfines at 2,600–3,000 G and nitrosyl features at 3,400 G is shown.
